# Supplementary material
Source: HighWire-hosted journal article supplement (http://www.qdcxjkg.com/highwire/filestream/114422/field_highwire_adjunct_files/0/Online_Supplement.pdf)
Supplement: Online_Supplement.pdf [file Online_Supplement.pdf]

## Age and sex distribution of patients presenting to specialist cough clinics

### Online Supplement

Age and gender of patients attending cough clinics in the UK, China and USA (Figures S1–S3).

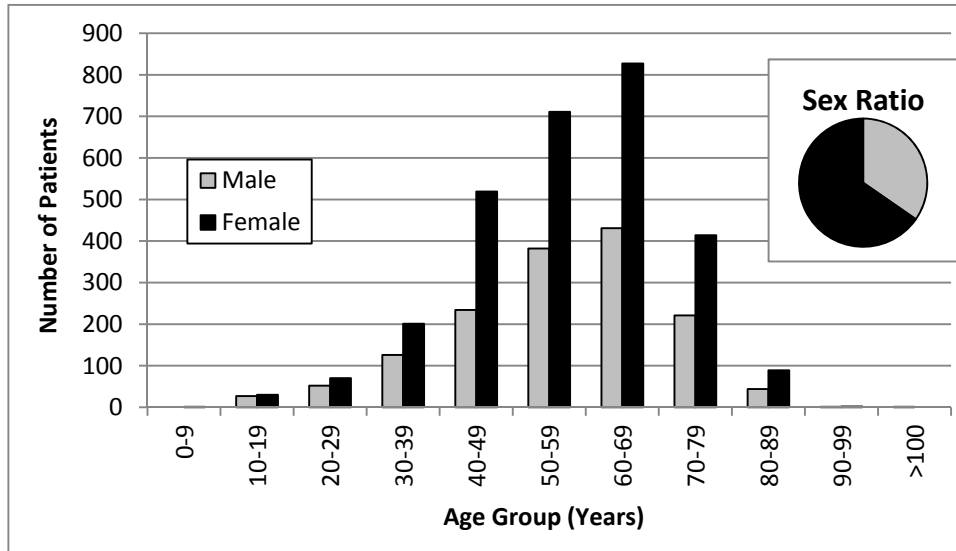

Figure S1: Sex and gender of patients attending cough clinics in the UK

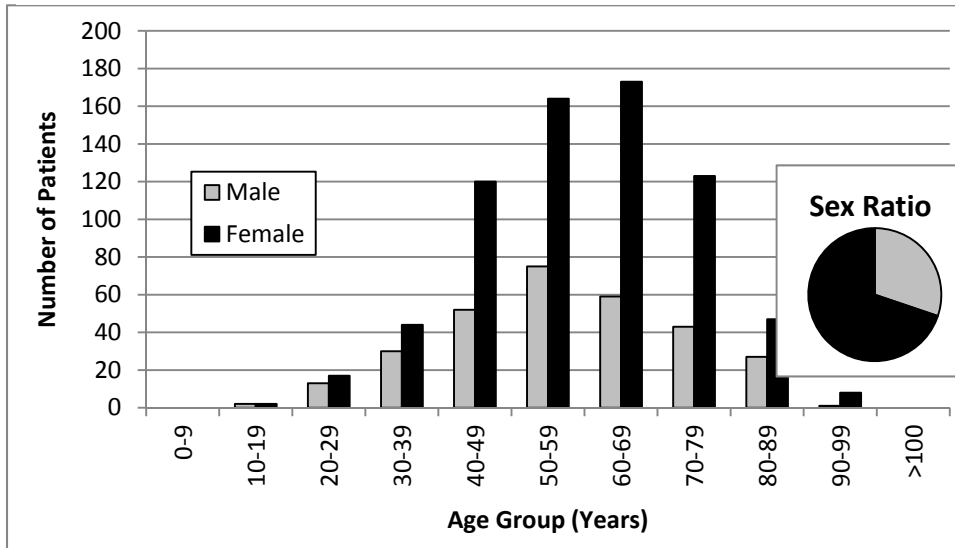

Figure S2: Sex and gender of patients attending cough clinics in the USA

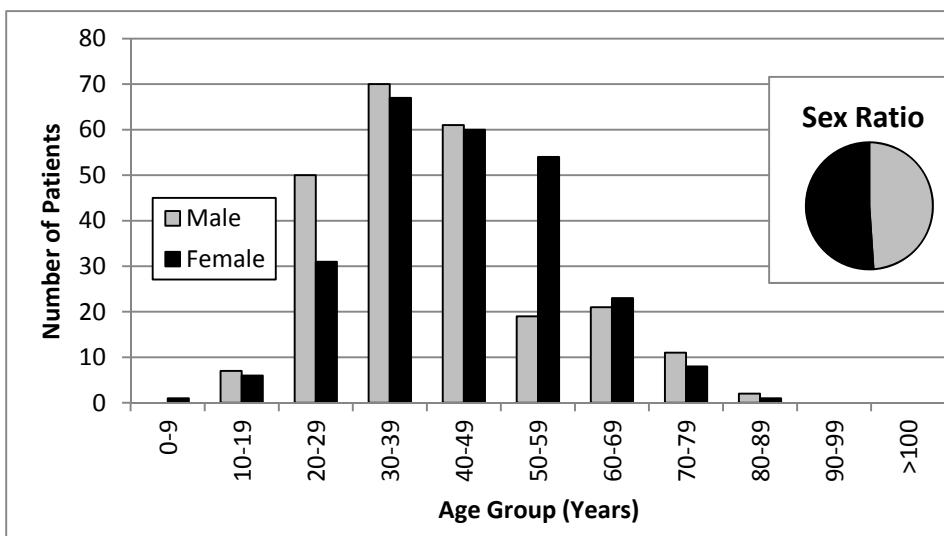

Figure S3: Age and gender of patients attending cough clinics in China

Age and gender of patients attending individual cough clinic in the UK (Figures S4-S9).

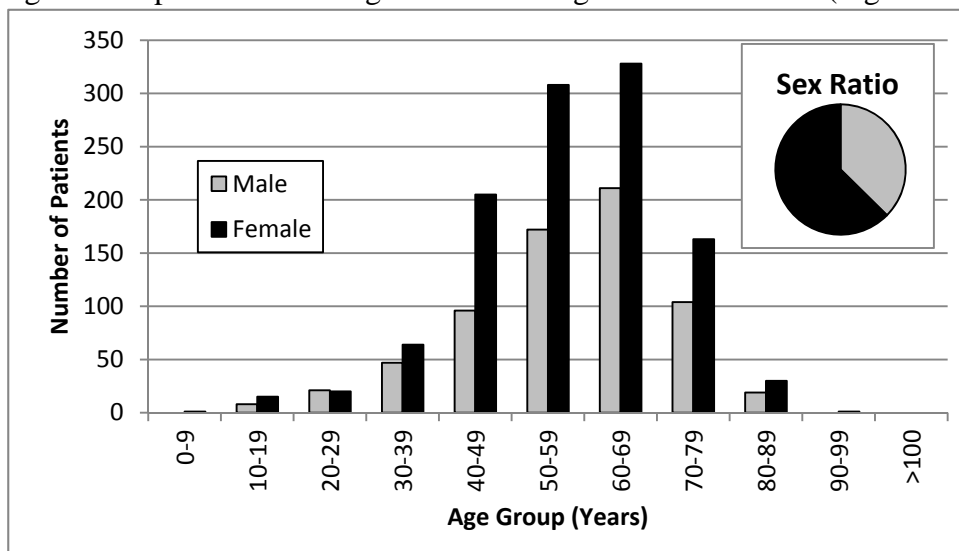

Figure S4: Age and gender of patients attending Hull cough clinic

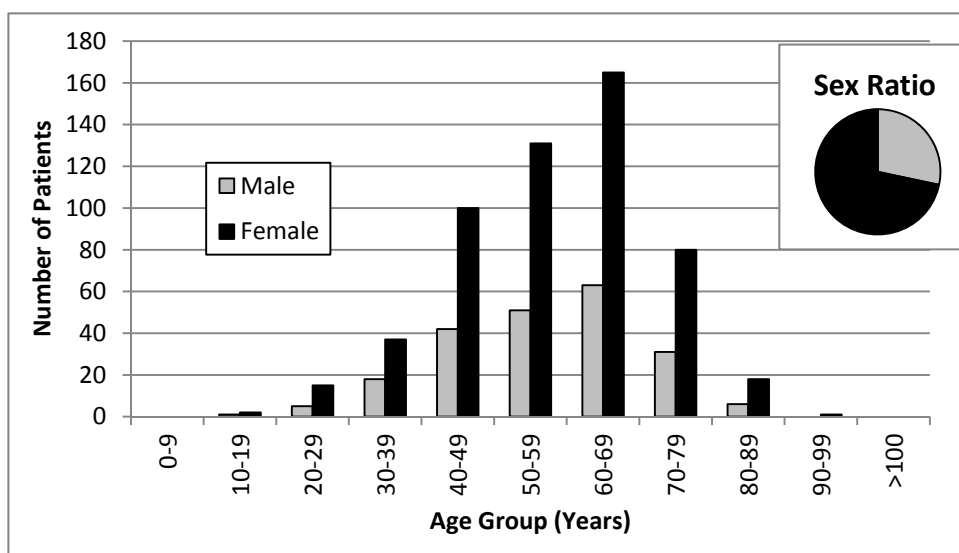

Figure S5: Age and gender of patients attending Manchester cough clinic

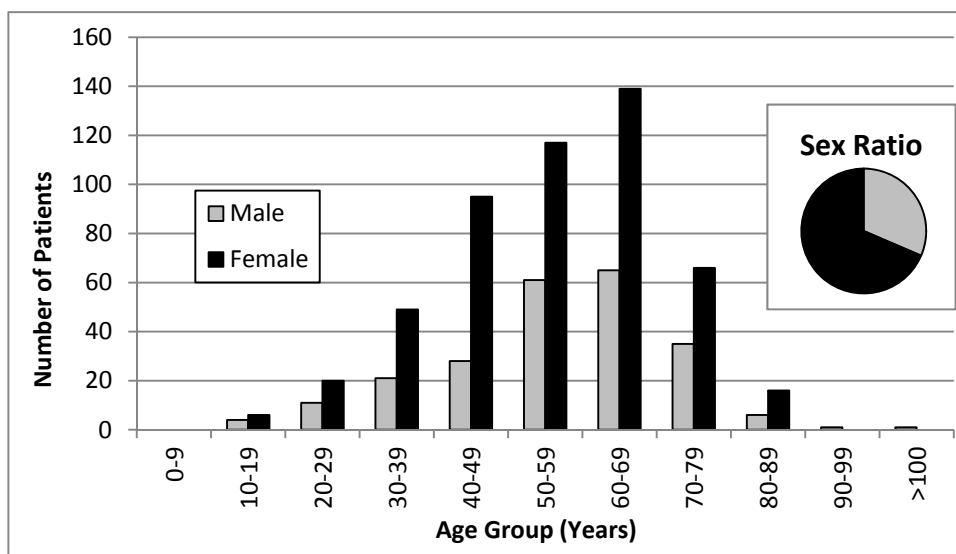

Figure S6: Age and gender of patients attending Brompton cough clinic

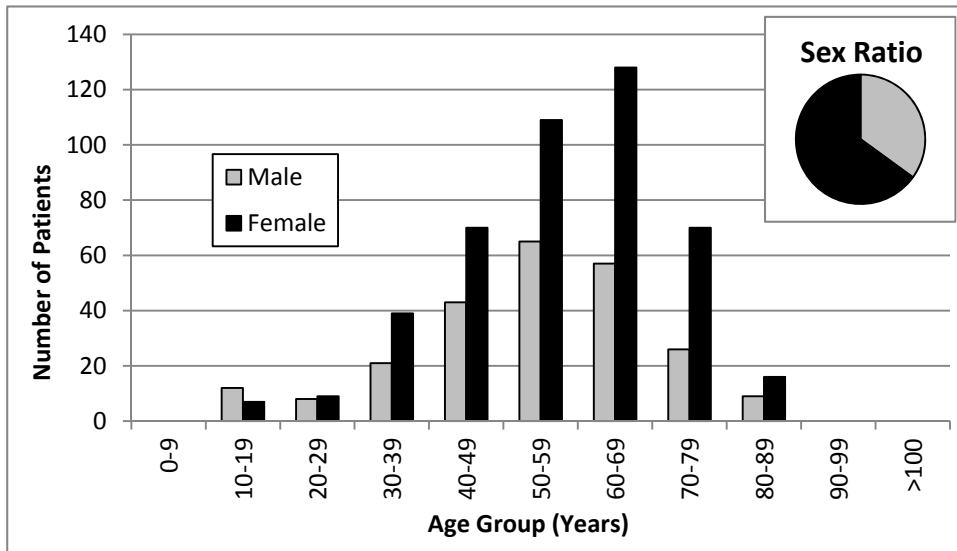

Figure S7: Age and gender of patients attending Belfast cough clinic

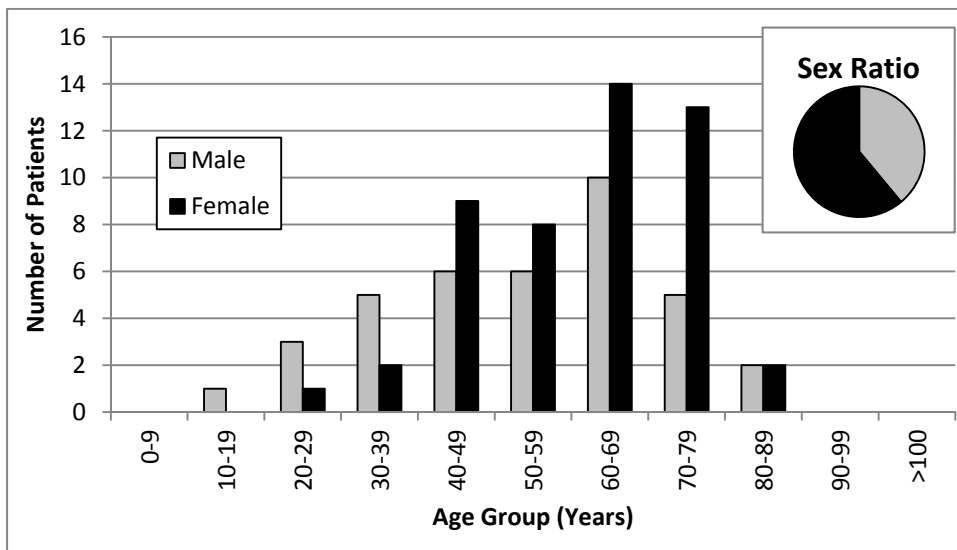

Figure S8: Age and gender of patients attending Leicester & Kings College London cough clinic

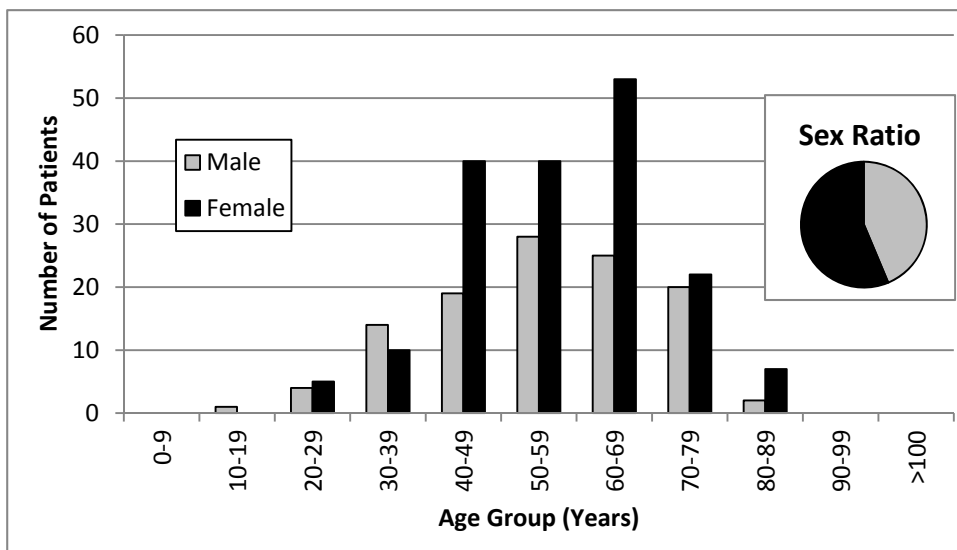

Figure S9: Age and gender of patients attending Northumbria cough clinic
